# Supplementary material for: Gall-Colonizing Ants and Their Role as Plant Defenders: From ’Bad Job’ to ’Useful Service’
Source: PubMed Central journal article supplement (PMC6920797; doi:10.3390/insects10110392), 2019-11-06
Supplement: insects-10-00392-s001.pdf [file insects-10-00392-s001.pdf]

**Table S1.** Multiple comparisons (Tukey test) for Field survey in order to investigate differences between ant species in gall colonization. One-Way ANOVA tests were conducted for the three variables measured: 1. position on the plant; 2. gall height; 3. gall width.

|                   |            | (I) species             | (J) species             | Difference between mean value (J-I) | Std. Er | Sig     |
|-------------------|------------|-------------------------|-------------------------|-------------------------------------|---------|---------|
| Position on plant | Tukey test | <i>Cr. scutellaris</i>  | <i>Temnothorax</i> spp. | 2.02795*                            | 0.26213 | < 0.001 |
|                   |            |                         | <i>Co. truncata</i>     | 0.20017                             | 0.34648 | 0.938   |
|                   |            |                         | empty                   | 2.88604*                            | 0.25360 | < 0.001 |
|                   |            | <i>Temnothorax</i> spp. | <i>Cr. scutellaris</i>  | -2.02795*                           | 0.26213 | < 0.001 |
|                   |            |                         | <i>Co. truncata</i>     | -1.82778*                           | 0.37913 | < 0.001 |
|                   |            |                         | empty                   | 0.85810*                            | 0.29666 | 0.025   |
|                   |            | <i>Co. truncata</i>     | <i>Cr. scutellaris</i>  | -0.20017                            | 0.34648 | 0.938   |
|                   |            |                         | <i>Temnothorax</i> spp. | 1.82778*                            | 0.37913 | < 0.001 |
|                   |            |                         | empty                   | 2.68587*                            | 0.37328 | < 0.001 |
|                   |            | Empty                   | <i>Cr. scutellaris</i>  | -2.88604*                           | 0.25360 | < 0.001 |
|                   |            |                         | <i>Temnothorax</i> spp. | -0.85810*                           | 0.29666 | 0.025   |
|                   |            |                         | <i>Co. truncata</i>     | -2.68587*                           | 0.37328 | < 0.001 |
| Gall height       | Tukey test | <i>Cr. scutellaris</i>  | <i>Temnothorax</i> spp. | 3.72387*                            | 1.07743 | 0.005   |
|                   |            |                         | <i>Co. truncata</i>     | -1.05718                            | 1.42414 | 0.880   |
|                   |            |                         | empty                   | 5.44377*                            | 1.04236 | < 0.001 |
|                   |            | <i>Temnothorax</i> spp. | <i>Cr. scutellaris</i>  | -3.72387*                           | 1.07743 | 0.005   |
|                   |            |                         | <i>Co. truncata</i>     | -4.78105*                           | 1.55835 | 0.015   |
|                   |            |                         | empty                   | 1.71990                             | 1.21935 | 0.496   |
|                   |            | <i>Co. truncata</i>     | <i>Cr. scutellaris</i>  | 1.05718                             | 1.42414 | 0.880   |
|                   |            |                         | <i>Temnothorax</i> spp. | 4.78105*                            | 1.55835 | 0.015   |
|                   |            |                         | empty                   | 6.50095*                            | 1.53431 | < 0.001 |
|                   |            | Empty                   | <i>Cr. scutellaris</i>  | -5.44377*                           | 1.04236 | < 0.001 |
|                   |            |                         | <i>Temnothorax</i> spp. | -1.71990                            | 1.21935 | 0.496   |
|                   |            |                         | <i>Co. truncata</i>     | -6.50095*                           | 1.53431 | < 0.001 |
| Gall width        | Tukey test | <i>Cr. scutellaris</i>  | <i>Temnothorax</i> spp. | 3.54618*                            | 1.00913 | 0.004   |
|                   |            |                         | <i>Co. truncata</i>     | -1.50709                            | 1.33386 | 0.672   |
|                   |            |                         | empty                   | 7.47179*                            | .97628  | < 0.001 |
|                   |            | <i>Temnothorax</i> spp. | <i>Cr. scutellaris</i>  | -3.54618*                           | 1.00913 | .004    |
|                   |            |                         | <i>Co. truncata</i>     | -5.05327*                           | 1.45957 | 0.005   |
|                   |            |                         | empty                   | 3.92561*                            | 1.14205 | 0.005   |
|                   |            | <i>Co. truncata</i>     | <i>Cr. scutellaris</i>  | 1.50709                             | 1.33386 | 0.672   |
|                   |            |                         | <i>Temnothorax</i> spp. | 5.05327*                            | 1.45957 | 0.005   |
|                   |            |                         | empty                   | 8.97889*                            | 1.43705 | < 0.001 |
|                   |            | Empty                   | <i>Cr. scutellaris</i>  | -7.47179*                           | 0.97628 | < 0.001 |
|                   |            |                         | <i>Temnothorax</i> spp. | -3.92561*                           | 1.14205 | 0.005   |
|                   |            |                         | <i>Co. truncata</i>     | -8.97889*                           | 1.43705 | < 0.001 |

**Table 2.** Comparisons (Tukey test) for Experiment 1 in order to investigate after 1 year differences between ant species in gall colonization. One-Way ANOVA tests were conducted for the three variables measured: 1. position on the plant; 2. gall height; 3. gall width.

|                   | Tukey test | (I) species             | (J)species              | Difference between mean value(J-I) | Std. Er | Sig     |
|-------------------|------------|-------------------------|-------------------------|------------------------------------|---------|---------|
| Position on plant |            | <i>Cr. scutellaris</i>  | <i>Temnothorax</i> spp. | 1.02452*                           | 0.34018 | 0.017   |
|                   |            |                         | <i>Co. truncata</i>     | 0.91986*                           | 0.31445 | 0.022   |
|                   |            |                         | empty                   | 2.50027*                           | 0.27896 | < 0.001 |
|                   |            | <i>Temnothorax</i> spp. | <i>Cr. scutellaris</i>  | -1.02452*                          | 0.34018 | 0.017   |
|                   |            |                         | <i>Co. truncata</i>     | -0.10467                           | 0.43047 | 0.995   |
|                   |            |                         | Empty                   | 1.47575*                           | 0.40527 | 0.002   |
|                   |            | <i>Co. truncata</i>     | <i>Cr. scutellaris</i>  | -0.91986*                          | 0.31445 | 0.022   |
|                   |            |                         | <i>Temnothorax</i> spp. | 0.10467                            | 0.43047 | 0.995   |
|                   |            |                         | empty                   | 1.58042*                           | 0.38393 | < 0.001 |
|                   |            | Empty                   | <i>Cr. scutellaris</i>  | -2.50027*                          | 0.27896 | < 0.001 |
|                   |            |                         | <i>Temnothorax</i> spp. | -1.47575*                          | 0.40527 | 0.002   |

|                         | Gall height            |                                    | Gall width                         |                         |          |         |         |
|-------------------------|------------------------|------------------------------------|------------------------------------|-------------------------|----------|---------|---------|
|                         | Tukey test             | ant species and colony composition | Difference between mean value(J-I) | Sig                     |          |         |         |
| Gall height             | Tukey test             | <i>Cr. scutellaris</i>             | <i>Co. truncata</i>                | -1.58042*               | 0.38393  | < 0.001 |         |
|                         |                        |                                    | <i>Temnothorax spp.</i>            | 3.03822                 | 1.43435  | 0.154   |         |
|                         |                        | <i>Temnothorax spp.</i>            | <i>Co. truncata</i>                | <i>Co. truncata</i>     | 1.90188  | 1.32585 | 0.481   |
|                         |                        |                                    |                                    | empty                   | 8.02084* | 1.17623 | < 0.001 |
|                         | <i>Cr. scutellaris</i> |                                    | <i>Cr. scutellaris</i>             | -3.03822                | 1.43435  | 0.154   |         |
|                         |                        |                                    | <i>Co. truncata</i>                | -1.13633                | 1.81504  | 0.923   |         |
|                         | <i>Co. truncata</i>    | empty                              | empty                              | 4.98262*                | 1.70881  | 0.022   |         |
|                         |                        |                                    | <i>Cr. scutellaris</i>             | -1.90188                | 1.32585  | 0.481   |         |
|                         |                        | <i>Temnothorax spp.</i>            | <i>Temnothorax spp.</i>            | 1.13633                 | 1.81504  | 0.923   |         |
|                         |                        |                                    | empty                              | 6.11896*                | 1.61881  | 0.001   |         |
|                         | Empty                  | <i>Cr. scutellaris</i>             | <i>Cr. scutellaris</i>             | -8.02084*               | 1.17623  | < 0.001 |         |
|                         |                        |                                    | <i>Temnothorax spp.</i>            | -4.98262*               | 1.70881  | 0.022   |         |
|                         |                        | <i>Co. truncata</i>                | <i>Co. truncata</i>                | -6.11896*               | 1.61881  | 0.001   |         |
|                         |                        |                                    | <i>Temnothorax spp.</i>            | 2.45606                 | 1.51872  | 0.374   |         |
|                         | Gall width             | Tukey test                         | <i>Cr. scutellaris</i>             | <i>Temnothorax spp.</i> | 1.11822  | 1.40384 | 0.856   |
|                         |                        |                                    |                                    | <i>Co. truncata</i>     | 9.93093* | 1.24542 | < 0.001 |
| <i>Temnothorax spp.</i> |                        |                                    | <i>Cr. scutellaris</i>             | <i>Cr. scutellaris</i>  | -2.45606 | 1.51872 | 0.374   |
|                         |                        |                                    |                                    | <i>Co. truncata</i>     | -1.33783 | 1.92181 | 0.898   |
|                         |                        | empty                              | empty                              | 7.47487*                | 1.80933  | < 0.001 |         |
|                         |                        |                                    | <i>Cr. scutellaris</i>             | -1.11822                | 1.40384  | 0.856   |         |
| <i>Co. truncata</i>     |                        | <i>Temnothorax spp.</i>            | <i>Temnothorax spp.</i>            | 1.33783                 | 1.92181  | 0.898   |         |
|                         |                        |                                    | empty                              | 8.81271*                | 1.71403  | < 0.001 |         |
|                         |                        | Empty                              | <i>Cr. scutellaris</i>             | -9.93093*               | 1.24542  | < 0.001 |         |
|                         |                        |                                    | <i>Temnothorax spp.</i>            | -7.47487*               | 1.80933  | < 0.001 |         |
| <i>Co. truncata</i>     |                        | <i>Co. truncata</i>                | -8.81271*                          | 1.71403                 | < 0.001  |         |         |

**Table S3.** Multiple comparisons (Tukey test) for 2D excavation area (see text for details) according to ant species and colony composition. One-Way ANOVA tests were run to compare excavation area in relation to species colonization and colony composition.

|            |                        |                      | ant species and colony composition          | Difference between mean value(J-I) | Std. Er  | Sig     |
|------------|------------------------|----------------------|---------------------------------------------|------------------------------------|----------|---------|
| Tukey test | Empty                  |                      | <i>Cr. scutellaris</i> -queen only          | -58.39338*                         | 15.96279 | 0.010   |
|            |                        |                      | <i>Cr. scutellaris</i> -queen+workers+brood | -114.45363*                        | 15.96279 | < 0.001 |
|            |                        |                      | <i>Cr. scutellaris</i> -workers+brood       | -201.19663*                        | 15.96279 | < 0.001 |
|            |                        |                      | <i>Cr. scutellaris</i> -workers only        | -270.68425*                        | 15.96279 | < 0.001 |
|            |                        |                      | <i>Co. truncata</i>                         | -70.84713*                         | 15.96279 | 0.001   |
|            |                        |                      | <i>Temnothorax spp.</i>                     | -132.83038*                        | 15.96279 | < 0.001 |
| Tukey test | <i>Cr. scutellaris</i> | queen only           | empty                                       | 58.39338*                          | 15.96279 | 0.010   |
|            |                        |                      | <i>Cr. scutellaris</i> -queen+workers+brood | -56.06025*                         | 15.96279 | 0.016   |
|            |                        |                      | <i>Cr. scutellaris</i> -workers+brood       | -142.80325*                        | 15.96279 | < 0.001 |
|            |                        |                      | <i>Cr. scutellaris</i> -workers only        | -212.29087*                        | 15.96279 | < 0.001 |
|            |                        |                      | <i>Co. truncata</i>                         | -12.45375                          | 15.96279 | 0.986   |
|            |                        |                      | <i>Temnothorax spp.</i>                     | -74.43700*                         | 15.96279 | < 0.001 |
| Tukey test | <i>Cr. scutellaris</i> | queen+ workers+brood | empty                                       | 114.45363*                         | 15.96279 | < 0.001 |
|            |                        |                      | <i>Cr. scutellaris</i> -queen only          | 56.06025*                          | 15.96279 | 0.016   |
|            |                        |                      | <i>Cr. scutellaris</i> -workers+brood       | -86.74300*                         | 15.96279 | < 0.001 |
|            |                        |                      | <i>Cr. scutellaris</i> -workers only        | -156.23062*                        | 15.96279 | < 0.001 |
|            |                        |                      | <i>Co. truncata</i>                         | 43.60650                           | 15.96279 | 0.112   |
|            |                        |                      | <i>Temnothorax spp.</i>                     | -18.37675                          | 15.96279 | 0.909   |
| Tukey test | <i>Cr. scutellaris</i> | workers+brood        | empty                                       | 201.19663*                         | 15.96279 | < 0.001 |
|            |                        |                      | <i>Cr. scutellaris</i> -queen only          | 142.80325*                         | 15.96279 | < 0.001 |
|            |                        |                      | <i>Cr. scutellaris</i> -queen+workers+brood | 86.74300*                          | 15.96279 | < 0.001 |
|            |                        |                      | <i>Cr. scutellaris</i> -workers only        | -69.48762*                         | 15.96279 | 0.001   |
|            |                        |                      | <i>Co. truncata</i>                         | 130.34950*                         | 15.96279 | < 0.001 |
|            |                        |                      | <i>Temnothorax spp.</i>                     | 68.36625*                          | 15.96279 | 0.002   |

|            |                         |              |                                             |             |          |         |
|------------|-------------------------|--------------|---------------------------------------------|-------------|----------|---------|
| Tukey test | <i>Cr. scutellaris</i>  | workers only | empty                                       | 270.68425*  | 15.96279 | < 0.001 |
|            |                         |              | <i>Cr. scutellaris</i> -queen only          | 212.29087*  | 15.96279 | < 0.001 |
|            |                         |              | <i>Cr. scutellaris</i> -queen+workers+brood | 156.23062*  | 15.96279 | < 0.001 |
|            |                         |              | <i>Cr. scutellaris</i> -workers+brood       | 69.48762*   | 15.96279 | 0.001   |
|            |                         |              | <i>Co. truncata</i>                         | 199.83713*  | 15.96279 | < 0.001 |
| Tukey test | <i>Co. truncata</i>     |              | <i>Temnothorax</i> spp.                     | 137.85388*  | 15.96279 | < 0.001 |
|            |                         |              | empty                                       | 70.84713*   | 15.96279 | 0.001   |
|            |                         |              | <i>Cr. scutellaris</i> -queen only          | 12.45375    | 15.96279 | 0.986   |
|            |                         |              | <i>Cr. scutellaris</i> -queen+workers+brood | -43.60650   | 15.96279 | 0.112   |
|            |                         |              | <i>Cr. scutellaris</i> -workers+brood       | -130.34950* | 15.96279 | < 0.001 |
| Tukey test | <i>Temnothorax</i> spp. |              | <i>Cr. scutellaris</i> -workers only        | -199.83713* | 15.96279 | < 0.001 |
|            |                         |              | <i>Temnothorax</i> spp.                     | -61.98325*  | 15.96279 | 0.005   |
|            |                         |              | empty                                       | 132.83038*  | 15.96279 | < 0.001 |
|            |                         |              | <i>Cr. scutellaris</i> -queen only          | 74.43700*   | 15.96279 | < 0.001 |
|            |                         |              | <i>Cr. scutellaris</i> -queen+workers+brood | 18.37675    | 15.96279 | 0.909   |
| Tukey test |                         |              | <i>Cr. scutellaris</i> -workers+brood       | -68.36625*  | 15.96279 | 0.002   |
|            |                         |              | <i>Cr. scutellaris</i> -workers only        | -137.85388* | 15.96279 | < 0.001 |
|            |                         |              | <i>Co. truncata</i>                         | 61.98325*   | 15.96279 | 0.005   |

**Table S4.** Multiple comparisons (Tukey test) to evaluate differences on excavation volume (see text for details) according to colony composition on galls colonized by *Cr. scutellaris*.

|            |                                         |               | <i>Cr. Scutellaris</i> colony composition   | Difference between mean value(J-I) | Std. Er | Sig     |
|------------|-----------------------------------------|---------------|---------------------------------------------|------------------------------------|---------|---------|
| Tukey test | <i>Cr. scutellaris</i>                  | queen only    | <i>Cr. scutellaris</i> -queen+workers+brood | -3.268*                            | 0.474   | < 0.001 |
|            |                                         |               | <i>Cr. scutellaris</i> -workers+brood       | -5.081*                            | 0.341   | < 0.001 |
|            |                                         |               | <i>Cr. scutellaris</i> -workers only        | -5.645*                            | 0.457   | < 0.001 |
| Tukey test | <i>Cr. scutellaris</i><br>workers+brood | queen+        | empty                                       | 1.673*                             | 0.394   | 0.001   |
|            |                                         |               | <i>Cr. scutellaris</i> -queen only          | 3.268*                             | 0.474   | < 0.001 |
|            |                                         |               | <i>Cr. scutellaris</i> -workers+brood       | -1.813*                            | 0.459   | 0.002   |
| Tukey test | <i>Cr. scutellaris</i>                  | workers+brood | <i>Cr. scutellaris</i> -workers only        | -2.378*                            | 0.551   | < 0.001 |
|            |                                         |               | empty                                       | 4.941*                             | 0.499   | < 0.001 |
|            |                                         |               | <i>Cr. scutellaris</i> -queen only          | 5.081*                             | 0.341   | < 0.001 |
| Tukey test | <i>Cr. scutellaris</i>                  | workers only  | <i>Cr. scutellaris</i> -queen+workers+brood | 1.813*                             | 0.459   | 0.002   |
|            |                                         |               | <i>Cr. scutellaris</i> -workers only        | -0.564                             | 0.441   | 0.705   |
|            |                                         |               | empty                                       | 6.754*                             | 0.376   | < 0.001 |
| Tukey test | empty                                   |               | <i>Cr. scutellaris</i> -queen only          | 5.645*                             | 0.457   | < 0.001 |
|            |                                         |               | <i>Cr. scutellaris</i> -queen+workers+brood | 2.378*                             | 0.551   | < 0.001 |
|            |                                         |               | <i>Cr. scutellaris</i> -workers+brood       | 0.564                              | 0.441   | 0.705   |
| Tukey test |                                         |               | empty                                       | 7.319*                             | 0.483   | < 0.001 |
|            |                                         |               | <i>Cr. scutellaris</i> -queen only          | -1.673*                            | 0.394   | 0.001   |
|            |                                         |               | <i>Cr. scutellaris</i> -workers+brood       | -4.941*                            | 0.499   | < 0.001 |
| Tukey test |                                         |               | <i>Cr. scutellaris</i> -workers+brood       | -6.754*                            | 0.376   | < 0.001 |
|            |                                         |               | <i>Cr. scutellaris</i> -workers only        | -7.319*                            | 0.483   | < 0.001 |
